# Supplementary material for: Comparative Genomics and Transcriptomics of Propionibacterium acnes
Source: PLoS One. 2011 Jun 27;6(6):e21581. doi: 10.1371/journal.pone.0021581 (PMC3124536; doi:10.1371/journal.pone.0021581)
Supplement: Table S2 — Gene expression changes between two P. acnes strains grown anaerobically to (A) mid-exponential phase or to (B) late-exponential phase in BHI medium. The data shown is based only on oligomers of the microarray which matched 100% in the two genomes KPA and 266. The intensities were calculated as the average intensity from oligomers that covered the respective gene. Only significantly de-regulated genes with fold changes >2 or <-2 are listed. For further details, see the GEO entry GSE26738 or go to: http://bioinfo.mpiib-berlin.mpg.de/pacnes/. (XLS) [file pone.0021581.s003.xls]

## Sheet: Table S2A
Table S2A: Gene expression changes between two P. acnes strains grown anaerobically to mid-exponential phase in BHI medium
The data shown is based only on oligomers of the microarray which matched 100% in the two genomes KPA and 266.
The intensities were calculated as the average intensity from oligomers that covered the respective gene. Only significantly de-regulated genes with fold changes >2 or <-2 are listed.
For further details see the GEO entry GSE26738 or go to: http://bioinfo.mpiib-berlin.mpg.de/pacnes/
gene (KPA)	annotation	fold-change	p-value	intensity KPA	intensity 266
PPA0535	ribosomal L25P family protein	6.03698	2.68431e-17	1714.17	10348.4
PPA1452	ribonuclease III	5.94002	3.64145e-33	4280.97	25429.1
PPA0705	putative ABC transporter ATP-binding protein	5.75136	1.15836e-34	388.727	2235.71
PPA2127	putative adhesion or S-layer protein	5.71653	2.67698e-21	4584.24	26206
PPA0581	NonF-related protein	5.61049	2.67854e-18	2608.53	14635.2
PPA1460	hypothetical protein PPA1460	5.09293	1.21336e-31	566.28	2884.02
PPA0141	hypothetical protein PPA0141	4.14314	5.6724e-12	1672.63	6929.94
PPA2437	Leu tRNA	4.01486	0	116.51	467.771
PPA0644	endoglycoceramidase	3.98464	0.0204917	2563.44	10214.4
PPA1859	30S ribosomal protein S19	3.92737	1.11912e-21	1728.63	6788.96
PPA1364	putative transcriptional regulator	3.88066	1.33548e-21	715.703	2777.4
PPA2031	ABC transporter associated permease	3.81857	1.40459e-11	307.541	1174.36
PPA1324	hypothetical protein PPA1324	3.8017	4.88933e-34	734.436	2792.11
PPA0928	putative ABC transporter	3.77946	9.76191e-22	654.335	2473.03
PPA1857	30S ribosomal protein S3	3.54063	2.86512e-31	3762.7	13322.3
PPA2110	low molecular weight protein-tyrosine-phosphatase	3.50258	1.50682e-26	275.355	964.455
PPA0073	hypothetical protein PPA0073	3.47592	2.01925e-12	273.223	949.702
PPA1860	50S ribosomal protein L2	3.46928	1.86786e-13	3022.64	10486.4
PPA2027	putative two component sensor kinase	3.42517	4.77945e-08	701.983	2404.41
PPA0924	queuine/archaeosine tRNA-ribosyltransferase	3.29264	0.0117775	458.482	1509.61
PPA1468	pyruvate dehydrogenase	3.28961	4.78916e-05	3781.8	12440.6
PPA1549	hypothetical protein PPA1549	3.11462	0.00466544	3692.52	11500.8
PPA1844	30S ribosomal protein S5	3.08977	2.58284e-36	2486.16	7681.66
PPA2007	methylmalonyl-CoA carboxyltransferase	3.0446	5.33338e-06	5241.62	15958.6
PPA0142	phosphotransferase system	3.04459	4.28529e-07	446.627	1359.8
PPA1828	30S ribosomal protein S11	3.0143	4.92323e-21	1612.95	4861.91
PPA1843	50S ribosomal protein L30	2.98596	1.39446e-40	938.047	2800.97
PPA2030	ABC transporter ATP-binding protein	2.96686	5.08072e-13	438.709	1301.59
PPA0580	stress-induced protein	2.95616	1.8396e-12	1298.37	3838.18
PPA1858	50S ribosomal protein L22	2.93829	9.39862e-14	3875.95	11388.7
PPA1550	ArsR family transcriptional regulator	2.92793	1.51295e-09	7728.79	22629.3
PPA2454	Phe tRNA	2.66613	8.1743e-12	206.745	551.211
PPA1856	50S ribosomal protein L16	2.64672	1.12591e-06	7212.3	19089
PPA0620	NAD-dependent aldehyde dehydrogenase	2.64293	0.00124328	277.114	732.394
PPA1451	formamidopyrimidine-DNA glycosylase	2.64234	4.33145e-20	1592.23	4207.23
PPA0360	putative sensor kinase	2.62844	2.51908e-33	311.671	819.207
PPA1546	ABC transporter ATP-binding protein	2.61982	3.79903e-07	2990.36	7834.19
PPA1678	hypothetical protein PPA1678	2.61439	9.8783e-12	1165.51	3047.08
PPA1204	hypothetical protein PPA1204	2.60606	0.000650252	4255.52	11090.1
PPA2121	ribonucleotide-diphosphate reductase subunit alpha	2.59374	0.000172518	1248.14	3237.35
PPA1906	hypothetical protein PPA1906	2.58587	0	1317.33	3406.43
PPA0195	putative RHS-family protein	2.55688	1.89735e-11	133.458	341.236
PPA1849	30S ribosomal protein S14	2.52353	6.37636e-09	8459.56	21348
PPA0074	ABC transporter, ATP-binding protein	2.49966	4.1427e-08	175.256	438.08
PPA1862	50S ribosomal protein L4	2.46297	9.584e-13	2556.25	6295.97
PPA0964	transcriptional regulator	2.45798	4.45133e-09	149.601	367.718
PPA1885	50S ribosomal protein L7/L12	2.45442	1.43635e-22	953.222	2339.61
PPA1754	succinyl-CoA synthetase subunit alpha	2.43185	6.25e-05	5127.81	12470.1
PPA1850	50S ribosomal protein L5	2.42141	8.79873e-09	4011.93	9714.52
PPA0498	molybdenum cofactor biosynthesis protein	2.39839	2.96991e-06	1163.79	2791.21
PPA1861	50S ribosomal protein L23	2.38202	1.65097e-14	2193.15	5224.12
PPA2229	single-strand DNA-binding protein	2.37683	0.000163353	18187.7	43229
PPA1402	hypothetical protein PPA1402	2.37607	1.28296e-06	7101.37	16873.4
PPA1848	30S ribosomal protein S8	2.37275	0.00023	3784.09	8978.69
PPA2105	triacylglycerol lipase precursor	2.36694	2.71289e-15	1129.73	2673.99
PPA1853	30S ribosomal protein S17	2.36401	1.5615e-16	1191.4	2816.48
PPA0143	putative phosphofructokinase	2.34427	1.38749e-08	278.365	652.563
PPA1877	hypothetical protein PPA1877	2.30996	2.94896e-12	563.437	1301.52
PPA1842	50S ribosomal protein L15	2.30645	9.9407e-16	778.993	1796.71
PPA1295	hypothetical protein PPA1295	2.30476	4.65017e-06	354.993	818.174
PPA2449	Thr tRNA	2.27374	3.62708e-09	1085.1	2467.23
PPA1845	50S ribosomal protein L18	2.27068	3.58681e-18	3608.27	8193.24
PPA1453	metal-binding protein	2.26177	6.70495e-07	4748.62	10740.3
PPA2008	oxaloacetate decarboxylase	2.22817	0.000359552	1002.33	2233.36
PPA1974	hypothetical protein PPA1974	2.20897	3.20355e-11	197.897	437.149
PPA1990	alkyl hydroperoxide reductase subunit F	2.20289	5.09177e-05	1895.85	4176.36
PPA2006	C-terminal fragment of methylmalonyl-CoA carboxyltransferase	2.16448	0.0061806	19943.5	43167.2
PPA1536	putative resistance protein	2.15674	7.05316e-11	332.407	716.917
PPA1493	translation initiation factor IF-2	2.15325	0.042689	2278.87	4906.99
PPA1749	riboflavin synthase subunit beta	2.14066	0.000536	726.414	1555.01
PPA1780	periplasmic binding protein	2.1355	2.37511e-06	1460.45	3118.79
PPA1779	Fe(III) dicitrate ABC transporter, permease	2.12804	1.36624e-08	1038.41	2209.77
PPA2230	30S ribosomal protein S6	2.12269	4.03583e-33	12094.3	25672.5
PPA1855	50S ribosomal protein L29	2.11464	2.89274e-15	2264.49	4788.6
PPA2208	putative transcriptional regulator	2.09483	2.00082e-09	200.599	420.222
PPA1197	hypothetical protein PPA1197	2.08338	0.00712834	14929.4	31103.6
PPA0741	putative GntR-famly transcriptional regulator	2.08309	4.00668e-13	374.958	781.071
PPA0943	hypothetical protein PPA0943	2.08092	1.47434e-06	476.141	990.811
PPA1058	Trk system potassium uptake protein TrkA	2.06374	4.93363e-09	3007.01	6205.68
PPA0499	molybdenum cofactor biosynthesis protein	2.04874	4.58333e-05	468.062	958.937
PPA1901	NADH dehydrogenase subunit	2.0257	1.32271e-15	1033.54	2093.65
PPA1258	homoserine dehydrogenase	2.01939	0.000131137	4765.41	9623.2
PPA0233	hypothetical protein PPA0233	-2.07665	2.70256e-13	707.469	340.679
PPA2394	hypothetical protein PPA2394	-2.10121	3.26724e-13	676.962	322.177
PPA1334	putative ribosomal S30AE, sigma 54 modulation protein	-2.11939	1.73773e-07	4691.57	2213.64
PPA1290	cystathionine beta-synthase	-2.14312	2.5004e-05	1826.85	852.426
PPA1287	non-ribosomal peptide synthetase	-2.16615	1.03244e-09	1321.89	610.247
PPA0983	3-oxoacyl-(acyl-carrier-protein) synthase III	-2.2007	2.27331e-07	6434.87	2924.01
PPA1777	hypothetical protein PPA1777	-2.22309	4.38357e-11	5064.83	2278.28
PPA0214	hypothetical protein PPA0214	-2.2335	2.62399e-09	1010.27	452.327
PPA0432	cobalt transport protein CbiN	-2.26644	3.66e-08	1923.11	848.518
PPA1807	hypothetical protein PPA1807	-2.30405	8.06817e-12	1231.17	534.352
PPA1024	hypothetical protein PPA1024	-2.30654	1.00582e-10	20783.1	9010.5
PPA1939	hypothetical protein PPA1939	-2.35555	5.31239e-10	13490.4	5727.08
PPA0980	3-oxoacyl-[acyl-carrier-protein] synthase 1	-2.36624	2.11426e-06	7177.15	3033.15
PPA1230	hypothetical protein PPA1230	-2.40937	5.69767e-06	6292.58	2611.71
PPA0400	putative transport system permease protein	-2.43416	5.9836e-07	4398.89	1807.15
PPA0785	dephospho-CoA kinase	-2.54252	4.56317e-16	2733.27	1075.02
PPA1009	transcriptional regulator	-2.59361	3.27867e-10	41958.6	16177.7
PPA1289	cysteine synthase/ornithine cyclodeaminase	-2.70829	4.58463e-07	1575.84	581.857
PPA2097	5'-nucleotidase/2',3'-cyclic phosphodiesterase or related esterase	-2.8225	7.69948e-08	1266.09	448.57
PPA0449	hypothetical protein PPA0449	-2.86138	1.34395e-34	969.131	338.693
PPA1652	hypothetical protein PPA1652	-2.87681	1.10506e-28	1754.05	609.722
PPA1288	surfactin synthetase subunit 1	-2.90884	2.81411e-14	1582.13	543.904
PPA1789	putative ABC transporter-associated permease	-2.9883	2.11507e-20	1120.82	375.07
PPA1771	hypothetical protein PPA1771	-2.98917	0.0111175	4019	1344.52
PPA0511	nitrate/nitrite transporter	-3.20106	3.03559e-15	2033.58	635.284
PPA1561	membrane protein, putative heme O synthase	-3.42852	0.0940786	9835.47	2868.72
PPA0448	hypothetical protein PPA0448	-3.45233	0	1165.58	337.622
PPA1145	hypothetical protein PPA1145	-3.52661	7.86454e-15	7172.31	2033.77
PPA0139	reductase, ferredoxin	-3.54061	5.93861e-15	2832.92	800.12
PPA1146	beta-glucosidase	-3.63289	2.90927e-14	11619.5	3198.41
PPA1286	putative thioesterase	-3.83321	0.000185453	8153.98	2127.19
PPA1578	hypothetical protein PPA1578	-4.01693	1.05635e-24	1025.7	255.345
PPA0140	putative ketoacyl reductase	-4.38214	1.00233e-23	3123.56	712.793
PPA1790	ABC transporter ATP-binding protein	-4.94024	2.22594e-39	2566.49	519.506
PPA1231	CAMP factor 4	-8.14127	6.67054e-18	5932.9	728.744
PPA1662	lysozyme M1 precursor	-11.8479	0	36645.1	3092.97
PPA0844	ABC transporter ATP-binding protein fragment	-11.9423	0	5032.58	421.409

## Sheet: Table S2B
Table S2B: Gene expression changes between two P. acnes strains grown anaerobically to late-exponential phase in BHI medium
The data shown is based only on oligomers of the microarray which matched 100% in the two genomes KPA and 266.
The intensities were calculated as the average intensity from oligomers that covered the respective gene. Only significantly de-regulated genes with fold changes >2 or <-2 are listed.
For further details see the GEO entry GSE26738 or go to: http://bioinfo.mpiib-berlin.mpg.de/pacnes/
gene (KPA)	annotation	fold-change	p-value	intensity KPA	intensity 266
PPA0580	stress-induced protein	11.2135	2.57764e-37	1309.71	14686.4
PPA1347	acetylornithine aminotransferase	10.9438	1.34659e-23	828.943	9071.75
PPA1348	acetylglutamate kinase	10.5442	2.47381e-20	1633.66	17225.6
PPA0581	NonF-related protein	9.8892	0	1026.54	10151.7
PPA1142	PTS system, sucrose-specific IIBC component	8.92493	7.3529e-21	1675.95	14957.7
PPA2201	argininosuccinate synthase	8.75123	1.26238e-32	727.12	6363.2
PPA1038	hypothetical protein PPA1038	8.71108	0	1186.97	10339.8
PPA2136	anaerobic ribonucleoside-triphosphate reductase activating protein	8.32383	0	740.039	6159.96
PPA1024	hypothetical protein PPA1024	7.68469	1.35345e-39	1737.38	13351.2
PPA2137	anaerobic ribonucleoside triphosphate reductase	7.62347	4.15625e-20	1383.47	10546.8
PPA0167	hypothetical protein PPA0167	7.45689	2.69288e-26	1301.2	9702.9
PPA1349	bifunctional ornithine acetyltransferase/N-acetylglutamate synthase protein	7.39871	3.66228e-34	1116.68	8261.99
PPA1025	transcriptional regulator NrdR	7.14156	1.81226e-11	3458.56	24699.5
PPA0168	putative iron-sulfur protein	6.9145	7.644e-19	1094.48	7567.81
PPA2242	putative metal-associated protein (copper chaperone)	6.89639	2.5504e-18	565.119	3897.28
PPA0169	hypothetical protein PPA0169	6.68884	4.2039e-45	1158.5	7748.99
PPA1549	hypothetical protein PPA1549	6.62943	0	1514.93	10043.1
PPA0166	putative L-lactate permease	6.58797	8.5715e-27	820.509	5405.49
PPA2243	hypothetical protein PPA2243	6.14147	1.65705e-14	3131.26	19230.5
PPA1039	putative aminooxidase	5.97895	9.14085e-19	780.824	4668.5
PPA0463	dehydrogenase, putative myo-inositol 2-dehydrogenase	5.94892	2.30186e-19	1174.63	6987.75
PPA0573	DNA recombination protein RmuC-like protein	5.81428	5.93159e-25	1124.56	6538.51
PPA0965	pyridoxine biosynthesis protein	5.73783	0.0840882	1537.62	8822.63
PPA1492	ABC transporter, ATP-binding protein	5.6899	8.94154e-21	1590.35	9048.93
PPA0876	putative transposase subunit	5.62731	0	911.874	5131.4
PPA0402	L-threonine 3-dehydrogenase	5.59232	3.09742e-34	1354.14	7572.79
PPA0403	2-amino-3-ketobutyrate coenzyme A ligase	5.47872	2.44839e-20	1136.79	6228.18
PPA0620	NAD-dependent aldehyde dehydrogenase	5.31901	1.40317e-11	831.888	4424.82
PPA0786	hypothetical protein PPA0786	5.28615	6.56524e-15	1616.99	8547.66
PPA0966	glutamine amidotransferase subunit PdxT	5.22449	2.29049e-15	2999.6	15671.4
PPA2240	cation-transporting ATPase	5.17934	1.76246e-18	1522.69	7886.53
PPA0464	sugar phosphate isomerase/epimerase	5.02708	2.18225e-35	1443.06	7254.39
PPA1037	hypothetical protein PPA1037	4.98999	9.22054e-43	1217.45	6075.05
PPA2305	glycerol uptake facilitator protein	4.88331	4.64527e-17	1357.02	6626.77
PPA1552	putative periplasmic maltose-binding protein	4.8574	0	1499.11	7281.76
PPA2021	ATP-dependent protease (Clp chaperone)	4.77559	7.70715e-20	447.078	2135.06
PPA1013	recombination regulator RecX	4.75146	7.0516e-34	1800.97	8557.23
PPA0632	glycine amidinotransferase	4.74633	1.28031e-29	1325.56	6291.53
PPA2167	allantoate amidohydrolase	4.68266	1.86919e-15	294.968	1381.24
PPA1141	N-acetylmuramic acid-6-phosphate etherase	4.54007	5.36498e-30	2798.87	12707.1
PPA1350	N-acetyl-gamma-glutamyl-phosphate reductase	4.47928	1.43865e-32	639.74	2865.58
PPA2130	OmpA family membrane associated protein	4.26837	2.68631e-31	272.55	1163.35
PPA0843	ABC transporter ATP-binding protein fragment	4.17543	0	245.716	1025.97
PPA0050	hypothetical protein PPA0050	4.07193	3.65192e-41	658.173	2680.04
PPA0465	myo-inositol catabolism IolH protein	3.95117	2e-06	691.303	2731.46
PPA2048	pyruvate phosphate dikinase	3.87653	1.127e-27	1555.87	6031.4
PPA0312	DNA repair protein RadA	3.82936	5.6872e-20	2267.71	8683.86
PPA0737	18 kDa antigen 2	3.81251	9.4137e-27	1796.51	6849.21
PPA2180	hypothetical protein PPA2180	3.61143	1e-05	2217.35	8007.81
PPA1711	short chain dehydrogenase	3.60796	8.13244e-16	1060.22	3825.24
PPA0015	ABC transporter protein	3.60233	1.35981e-05	386.509	1392.33
PPA1427	CsbD-like protein	3.56062	1.03292e-10	5516.79	19643.2
PPA1812	ABC transporter-associated permease	3.49565	0	306.699	1072.11
PPA1346	argininosuccinate lyase	3.49521	3.66417e-23	1692.1	5914.26
PPA0094	aspartate ammonia-lyase	3.47826	1.02069e-11	1682.77	5853.12
PPA2304	glycerol kinase 2	3.4768	3.52427e-24	956.911	3326.99
PPA2429	Arg tRNA	3.4612	2.35959e-23	364.963	1263.21
PPA1205	TetR family transcriptional regulator	3.45803	3.81171e-19	2164.09	7483.47
PPA0389	hypothetical protein PPA0389	3.43145	2.57854e-35	2172.77	7455.76
PPA1334	putative ribosomal S30AE, sigma 54 modulation protein	3.41358	2.10838e-16	5062.1	17279.9
PPA2118	NADH:flavin oxidoreductase	3.40079	1.75032e-19	399.55	1358.79
PPA0180	hypothetical protein PPA0180	3.37975	5.17389e-15	2470.2	8348.64
PPA0932	proline iminopeptidase	3.29899	7.65786e-21	2569.83	8477.84
PPA0218	putative transport protein	3.29246	6.49462e-10	2936.31	9667.71
PPA1012	RecA protein	3.2846	6.8841e-23	2898.8	9521.41
PPA1329	NAD-glutamate dehydrogenase	3.26756	0.014151	1911.05	6244.45
PPA1330	hypothetical protein PPA1330	3.25147	0	1216.63	3955.83
PPA1999	hypothetical protein PPA1999	3.24924	1.3375e-15	724.626	2354.48
PPA0390	hypothetical protein PPA0390	3.2367	4.46326e-30	2551.81	8259.44
PPA0020	hypothetical protein PPA0020	3.19968	9.6566e-16	1372.42	4391.31
PPA0387	hypothetical protein PPA0387	3.19557	0.20011	1613.56	5156.24
PPA1710	hypothetical protein PPA1710	3.17042	1.38584e-14	2527.69	8013.84
PPA2166	urocanate hydratase	3.16847	2.65311e-11	834.812	2645.08
PPA2295	solute-binding lipoprotein	3.1553	2.12538e-13	399.094	1259.26
PPA1550	ArsR family transcriptional regulator	3.14517	6.32535e-30	2121.61	6672.81
PPA1906	hypothetical protein PPA1906	3.13225	5.32238e-14	6098.72	19102.7
PPA0014	putative transcriptional regulator	3.10702	2.29231e-07	541.243	1681.65
PPA0283	allophanate hydrolase subunit 1	3.09434	3.66366e-12	1536.59	4754.74
PPA0677	PTS system, glucose-specific IIB component	3.08888	1.4707e-28	2820.32	8711.63
PPA2396	hypothetical protein PPA2396	3.08769	4.81313e-19	861.176	2659.04
PPA2232	PTS system, fructose/mannitol specific IIA subunit	3.08557	5.12182e-20	866.572	2673.87
PPA1026	vitamin B12-dependent ribonucleotide reductase	3.04346	0.0124091	3757.6	11436.1
PPA0436	precorrin 8 decarboxylase CbiT	3.0201	1.33436e-28	532.579	1608.44
PPA1320	putative ATP-dependent DNA helicase	2.95339	2.5138e-08	1497.32	4422.18
PPA2049	hypothetical protein PPA2049	2.94939	3.07656e-19	1776.42	5239.37
PPA0079	aldehyde dehydrogenase	2.92967	5.91217e-16	876.48	2567.8
PPA0391	hypothetical protein PPA0391	2.91536	6.85356e-12	4074.04	11877.3
PPA0481	hypothetical protein PPA0481	2.91412	2.5498e-30	1905.95	5554.17
PPA0921	ATP-dependent DNA helicase	2.87412	2.51305e-10	1548.06	4449.3
PPA1489	ribosome-binding factor A	2.85675	1.48985e-29	1427.19	4077.12
PPA2408	Ile tRNA	2.84496	1.56773e-35	710.973	2022.69
PPA0642	dihydrodipicolinate synthase	2.83933	2.22362e-15	3058.66	8684.55
PPA2306	transcriptional regulator	2.83213	1.43686e-17	1861.5	5272.01
PPA0992	beta-glucosidase fragment	2.787	4.16019e-22	3408.43	9499.31
PPA2347	FemAB family protein	2.77185	0.00146716	761.706	2111.34
PPA1534	hypothetical protein PPA1534	2.76562	8.4688e-16	792.615	2192.07
PPA0925	putative two-component system sensor kinase	2.73885	4.7259e-10	1397.84	3828.47
PPA0217	membrane associated protein	2.72651	2.60791e-15	413.334	1126.96
PPA0404	putative substrate-binding protein	2.67118	0.0148961	1318.09	3520.86
PPA1554	maltose transport system permease protein MalG	2.63527	2.89063e-21	2773.93	7310.07
PPA2453	Asp tRNA	2.62028	1.22766e-10	1637.85	4291.63
PPA2121	ribonucleotide-diphosphate reductase subunit alpha	2.61615	1.49962e-06	693.668	1814.74
PPA0887	L-lactate dehydrogenase	2.60227	0.138904	1503.57	3912.7
PPA0204	DNA polymerase III subunits gamma and tau	2.59917	0.0129132	1010.54	2626.56
PPA2235	endonuclease IV	2.57592	5.08933e-15	1604.32	4132.61
PPA0565	putative hemolysin	2.5728	4.14383e-14	2281.17	5868.99
PPA0490	hypothetical protein PPA0490	2.56397	9.19718e-43	683.716	1753.02
PPA0543	nucleoside triphosphate pyrophosphohydrolase	2.55549	6.76661e-13	1601.12	4091.64
PPA1204	hypothetical protein PPA1204	2.5453	0.0034408	1554.27	3956.1
PPA1176	recombination factor protein RarA	2.54517	9.7832e-16	753.932	1918.88
PPA1011	hypothetical protein PPA1011	2.52632	4.13422e-32	1631.6	4121.94
PPA0535	ribosomal L25P family protein	2.51883	1.30659e-14	695.041	1750.69
PPA0963	cysteine synthase	2.50758	1.36223e-12	1135.43	2847.18
PPA0886	thiamin-phosphate pyrophosphorylase	2.49588	1.90445e-19	894.762	2233.22
PPA1652	hypothetical protein PPA1652	2.48421	5.0523e-32	2531.82	6289.57
PPA0604	putative sugar binding protein	2.47985	7.31154e-10	1298.17	3219.27
PPA0536	peptidyl-tRNA hydrolase	2.47542	0.003398	404.273	1000.74
PPA2454	Phe tRNA	2.47002	1.24976e-12	4097.68	10121.4
PPA1712	phosphomethylpyrimidine kinase	2.46834	0.0733025	1590.07	3924.82
PPA2257	putative DNA repair exonuclease or phosphoesterase	2.46701	2.06987e-13	710.35	1752.44
PPA1801	phosphoglucomutase/phosphomannomutase	2.4661	6.03669e-08	1981.26	4885.99
PPA2410	Ser tRNA	2.45904	4.28247e-08	1525.51	3751.29
PPA2267	6-phosphofructokinase, type C	2.45882	4.59432e-06	1023.89	2517.56
PPA0923	hypothetical protein PPA0923	2.45745	5.1225e-10	1935.96	4757.52
PPA0689	lipoyl synthase	2.44508	7.96642e-10	2130.01	5208.03
PPA0477	cold shock protein	2.44493	8.4327e-34	1373.69	3358.56
PPA1740	malate dehydrogenase	2.44176	4.28571e-06	2388.99	5833.35
PPA2111	hypothetical protein PPA2111	2.4167	1.21345e-10	179.01	432.613
PPA1258	homoserine dehydrogenase	2.40305	3.69008e-14	2041.86	4906.68
PPA0159	hypothetical protein PPA0159	2.39415	0.000425	618.196	1480.06
PPA1345	hypothetical protein PPA1345	2.37381	1.69468e-06	855.018	2029.65
PPA1312	metal-dependent hydrolase	2.37102	1.05678e-16	1890.52	4482.48
PPA0244	DNA polymerase III subunit delta'	2.32974	1.22001e-06	1306.45	3043.7
PPA0478	hypothetical protein PPA0478	2.32671	1.31182e-10	4290.28	9982.24
PPA1014	hypothetical protein PPA1014	2.32323	7.69237e-07	913.035	2121.19
PPA0807	excinuclease ABC subunit A	2.31132	7.4181e-09	2090.87	4832.67
PPA1128	hypothetical protein PPA1128	2.31057	1.02267e-13	3321.1	7673.65
PPA1016	putative C4-dicarboxylate anaerobic carrier DcuC	2.30929	0.0718808	1848.27	4268.2
PPA0361	putative phosphate transport system protein	2.30923	1.88847e-20	947.673	2188.4
PPA1529	hypothetical protein PPA1529	2.30416	2.36926e-19	3053.04	7034.71
PPA1741	putative propionaldehyde dehydrogenase / ethanolamine utilization protein EutE	2.2983	0.00140373	1223.21	2811.3
PPA0245	hypothetical protein PPA0245	2.29288	5.42771e-07	3194.38	7324.34
PPA1127	hypothetical protein PPA1127	2.2896	5.78855e-18	2933.9	6717.44
PPA0372	3-ketoacyl-(acyl-carrier-protein) reductase	2.28155	4.07627e-11	3166.95	7225.56
PPA2334	hypothetical protein PPA2334	2.27535	1.27788e-07	571.745	1300.92
PPA1225	pyridoxamine kinase	2.27025	0.001211	1491.47	3386.01
PPA1651	nucleotidyltransferase/DNA polymerase involved in DNA repair (UmuC)	2.26974	1.35325e-08	1511.76	3431.3
PPA1036	hypothetical protein PPA1036	2.26944	1.70317e-11	1915.14	4346.28
PPA1470	dihydrodipicolinate reductase	2.26927	1.31554e-17	3275.42	7432.82
PPA1259	diaminopimelate decarboxylase	2.26895	3.49079e-13	1162.02	2636.57
PPA0796	ABC transporter ATP-binding protein	2.26849	3.56588e-31	313.418	710.986
PPA1998	dihydrodipicolinate synthase	2.25838	0.016516	1047.62	2365.92
PPA0386	hypothetical protein PPA0386	2.25764	0.000195385	1263.74	2853.08
PPA0017	periplasmic sugar-binding protein	2.25605	0.000645157	553.8	1249.4
PPA2425	Cys tRNA	2.24732	4.42729e-13	2253.02	5063.27
PPA0012	L-lactate dehydrogenase	2.23771	4.72091e-07	996.129	2229.05
PPA0282	hypothetical protein PPA0282	2.23592	3.43205e-14	1613.55	3607.76
PPA0927	ABC transporter, ATP-binding protein	2.2349	7.48881e-09	860.553	1923.25
PPA1698	succinoglycan biosynthesis protein ExoA	2.2333	4.72279e-08	1658.03	3702.89
PPA1008	putative competence-damage inducible protein	2.20995	2.00475e-19	1593.17	3520.83
PPA0360	putative sensor kinase	2.20632	3.81482e-28	501.848	1107.24
PPA0392	putative RNA polymerase sigma factor	2.19004	7.67013e-16	1668.63	3654.36
PPA1919	citrate lyase beta chain	2.18355	1.34267e-05	649.644	1418.53
PPA1535	membrane spanning protein	2.18334	0.000663381	967.338	2112.02
PPA2234	putative long-chain-fatty-acid--CoA ligase/synthetase	2.17987	1.21115e-06	1896.43	4133.98
PPA1994	adenylosuccinate synthetase	2.15433	6.19392e-09	2221.52	4785.89
PPA0125	hypothetical protein PPA0125	2.15236	0.0827163	462.935	996.403
PPA2072	hypothetical protein PPA2072	2.14304	5.52805e-16	956.397	2049.6
PPA2330	LacI family transcription regulator	2.13773	6.03282e-06	663.465	1418.31
PPA0095	anaerobic C4-dicarboxylate transporter	2.12585	5.96348e-08	1491.8	3171.33
PPA2094	pyruvate dehydrogenase E1 component, alpha subunit	2.12359	0.00104	804.275	1707.95
PPA0774	DNA polymerase I	2.11462	4.16249e-10	2075.53	4388.97
PPA1824	glycosyl transferase	2.11229	1.29458e-09	1385.47	2926.5
PPA1760	ABC transporter associated permease	2.10908	4.62316e-12	2018.48	4257.14
PPA0237	putative helicase	2.10636	0.0093774	538.51	1134.3
PPA2337	aminotransferase	2.10035	0.066274	369.515	776.111
PPA0366	putative phosphotransferase enzyme	2.10017	1.84517e-17	3716.3	7804.85
PPA0563	hypothetical protein PPA0563	2.0979	2.08683e-08	1944.6	4079.59
PPA0277	hypothetical protein PPA0277	2.08132	9.25008e-05	6912.32	14386.7
PPA0574	putative aminopeptidase 2	2.08049	0.0145073	1415.92	2945.81
PPA2054	amidase	2.06248	2.67401e-07	427.001	880.682
PPA2426	Gly tRNA	2.06226	8.01516e-10	3572.81	7368.07
PPA0049	formate--tetrahydrofolate ligase	2.0609	3.26695e-05	713.353	1470.15
PPA0016	ribose ABC transporter	2.05988	1.28572e-05	943.359	1943.21
PPA1174	hypothetical protein PPA1174	2.05886	1.67008e-12	1570.07	3232.56
PPA0319	putative delta-1-pyrroline-5-carboxylate reductase	2.04752	3.31807e-08	3961.66	8111.58
PPA1642	oligoribonuclease	2.04698	5.59566e-10	1217.89	2493.01
PPA0385	hypothetical protein PPA0385	2.04359	3.13324e-28	705.54	1441.84
PPA2456	Leu tRNA	2.04167	7.19397e-07	4376.67	8935.69
PPA2260	TetR family transcriptional regulator	2.04031	1.75689e-14	1795.6	3663.59
PPA0814	hypothetical protein PPA0814	2.03702	2.78664e-10	884.834	1802.43
PPA0815	hypothetical protein PPA0815	2.03097	1.11481e-06	655.94	1332.19
PPA1265	sensory transduction histidine kinase	2.02925	7.71432e-05	1365.01	2769.96
PPA1640	hypothetical protein PPA1640	2.00808	5.40189e-07	6444.1	12940.2
PPA1410	putative rRNA methylase	-2.00002	4.08194e-09	9904.65	4952.27
PPA1856	50S ribosomal protein L16	-2.00295	1.05342e-17	10058.8	5021.98
PPA0242	hypothetical protein PPA0242	-2.0243	0.056415	1307.12	645.714
PPA1401	putative hydrolase	-2.06386	7.17138e-07	2587.33	1253.63
PPA0424	hypothetical protein PPA0424	-2.08533	1.00238e-12	3099.11	1486.15
PPA0938	putative hemolysin	-2.08816	3.41048e-11	1807.61	865.649
PPA1853	30S ribosomal protein S17	-2.09529	3.73115e-08	3886.82	1855.03
PPA0300	A/G-specific adenine glycosylase	-2.10435	6.16126e-24	2563.73	1218.3
PPA0534	hypothetical protein PPA0534	-2.10738	4.48667e-08	6320.06	2999.02
PPA1202	hypothetical protein PPA1202	-2.11474	2.79957e-09	8048.68	3805.99
PPA1884	DNA-directed RNA polymerase subunit beta	-2.12147	0.0597365	3891.1	1834.15
PPA1475	substrate binding component of glycine/betaine transport system	-2.12258	5.38757e-07	2004.81	944.518
PPA1165	ion channel membrane protein	-2.14253	1.36608e-09	1793.59	837.14
PPA0010	DNA gyrase subunit A	-2.1442	2.00007e-05	698.328	325.682
PPA0754	UDP-N-acetylmuramyl pentapeptide synthase	-2.16144	3.84616e-06	2580.37	1193.82
PPA1932	NADH dehydrogenase subunit E	-2.16254	0.0418714	5852.45	2706.29
PPA0449	hypothetical protein PPA0449	-2.16859	5.01066e-14	16596.8	7653.28
PPA1867	hypothetical protein PPA1867	-2.17219	1.55988e-08	2041.07	939.635
PPA1002	dihydroorotate dehydrogenase B, catalytic subunit	-2.17552	1.90275e-13	2630.35	1209.07
PPA1790	ABC transporter ATP-binding protein	-2.17943	1.25139e-19	1061.79	487.186
PPA1789	putative ABC transporter-associated permease	-2.18293	1.5698e-09	1181.9	541.426
PPA0752	cell division protein FtsI/penicillin-binding protein 2	-2.19377	0.000141062	2585.2	1178.42
PPA0476	glucosamine-6-phosphate deaminase	-2.20906	7.66692e-05	2179.21	986.488
PPA1344	hypothetical protein PPA1344	-2.21829	5.2865e-13	19140.1	8628.29
PPA1441	16S rRNA processing protein RimM	-2.23937	1.33228e-13	5116.38	2284.74
PPA0506	putative regulator	-2.26076	1.59983e-09	3759.78	1663.06
PPA1819	beta-galactosidase	-2.26088	2.42792e-29	1520.33	672.447
PPA0209	putative permease	-2.27416	0.0485167	1488.31	654.445
PPA1675	glutamate racemase	-2.30222	0.18556	1596.89	693.632
PPA0708	inositol-5-monophosphate dehydrogenase	-2.30309	4.94886e-14	1101.45	478.248
PPA1286	putative thioesterase	-2.31576	4.21536e-08	3519.15	1519.65
PPA0507	nitrate reductase gamma subunit	-2.32169	1.58392e-06	4166.11	1794.43
PPA1440	tRNA (guanine-N(1)-)-methyltransferase	-2.32402	1.07032e-10	3459.87	1488.74
PPA1164	adenine phosphoribosyltransferase	-2.32791	8.50531e-09	1571.67	675.142
PPA1990	alkyl hydroperoxide reductase subunit F	-2.33403	0.116989	5335.62	2286.01
PPA0826	putative ribonuclease	-2.33533	0.00248002	1602.21	686.074
PPA1397	hypothetical protein PPA1397	-2.34506	4.0296e-26	1121.54	478.259
PPA1855	50S ribosomal protein L29	-2.34972	1.98752e-22	15158.2	6451.04
PPA0317	putative protease	-2.35134	3.00188e-08	4856.77	2065.53
PPA1274	putative ATP-binding ABC transporter protein	-2.35351	7.67654e-08	2353.66	1000.06
PPA1578	hypothetical protein PPA1578	-2.38374	5.8927e-25	325.498	136.549
PPA0990	endo-beta-N-acetylglucosaminidase H	-2.39068	6.17319e-10	2559.29	1070.53
PPA1731	ABC transporter associated permease	-2.40525	3.19965e-11	4989	2074.21
PPA0822	hypothetical protein PPA0822	-2.42616	1.80781e-19	10115.3	4169.26
PPA0331	hypothetical protein PPA0331	-2.42618	3.62151e-10	2998.37	1235.84
PPA0937	putative metalloprotease	-2.42846	4.44208e-15	1354.11	557.599
PPA0671	glutamine synthetase	-2.44951	0.00237467	2665.68	1088.25
PPA0838	phosphoglycerate mutase/fructose-2,6-bisphosphatase	-2.45093	1.57159e-08	3566.92	1455.34
PPA0583	arginine deiminase	-2.48994	2.51359e-15	7034.38	2825.12
PPA1730	cytidine deaminase	-2.51657	1.4056e-13	4250.19	1688.88
PPA1834	adenylate kinase	-2.54845	4.75757e-15	3207.96	1258.79
PPA1771	hypothetical protein PPA1771	-2.55201	9.81122e-31	6643.16	2603.11
PPA2287	galactokinase	-2.59685	1.06839e-16	2228.82	858.28
PPA1221	apolipoprotein N-acyltransferase	-2.60702	8.47655e-09	3299.38	1265.58
PPA0214	hypothetical protein PPA0214	-2.60904	5.45366e-15	2948	1129.92
PPA1910	ABC transporter permease	-2.61311	0.074106	3389.02	1296.93
PPA0823	nucleoside diphosphate kinase	-2.625	4.34319e-29	8483.73	3231.9
PPA0139	reductase, ferredoxin	-2.63244	0.000862222	3363.12	1277.57
PPA1288	surfactin synthetase subunit 1	-2.67342	9.10088e-13	3424.74	1281.03
PPA0448	hypothetical protein PPA0448	-2.69168	9.63538e-33	5324.58	1978.16
PPA1088	putative tRNA-processing ribonuclease	-2.73279	0.00323533	7627.03	2790.93
PPA1875	elongation factor G	-2.78806	0.0329735	3341.64	1198.55
PPA0777	hypothetical protein PPA0777	-2.799	6.3855e-12	5768.73	2061
PPA1636	putative ABC transporter ATP-binding protein	-2.84888	5.29364e-08	10329.9	3625.93
PPA1925	NADH dehydrogenase subunit K	-2.86451	1.20051e-16	14395.2	5025.36
PPA1926	NADH dehydrogenase subunit J	-2.87324	2.14028e-12	7300.8	2540.96
PPA1133	prolipoprotein diacylglyceryl transferase	-2.90397	1.15229e-08	3805.88	1310.58
PPA1816	ABC transporter associated permease	-2.93252	1e-05	8618.88	2939.07
PPA1163	preprotein translocase subunit SecF	-2.94583	0.00108715	8507.09	2887.84
PPA1930	NADH dehydrogenase subunit G	-2.959	2.15347e-08	4533.87	1532.23
PPA1787	ATP-dependent RNA helicase	-3.02997	1.9176e-13	1166.96	385.139
PPA1807	hypothetical protein PPA1807	-3.04325	1.20887e-31	1789.66	588.073
PPA1001	dihydroorotate dehydrogenase electron transfer subunit	-3.05475	3.77929e-16	2399.28	785.425
PPA0755	phospho-N-acetylmuramoyl-pentapeptide-transferase	-3.07406	6.17696e-11	5725.39	1862.48
PPA1922	NADH dehydrogenase subunit N	-3.11879	1.95786e-11	11275.4	3615.31
PPA0584	ornithine carbamoyltransferase, catabolic	-3.15338	3.01033e-11	5339.25	1693.19
PPA1241	F0F1 ATP synthase subunit alpha	-3.17156	5.1533e-26	5069.84	1598.53
PPA0532	hypothetical protein PPA0532	-3.1903	1.28707e-13	7186.37	2252.57
PPA0432	cobalt transport protein CbiN	-3.20108	3.65555e-24	8565.78	2675.9
PPA0977	aerotolerance protein BatA	-3.22597	3.7125e-17	4838.09	1499.73
PPA1822	organic anion transporter family protein	-3.23489	2.2062e-08	3583.08	1107.64
PPA1275	permease protein of oligopeptide ABC transporter	-3.25467	5.38462e-06	3741.84	1149.69
PPA2239	hypothetical protein PPA2239	-3.26203	1.26667e-05	4857.59	1489.13
PPA1931	NADH dehydrogenase I chain F	-3.26843	0.0255273	7773.06	2378.22
PPA0433	cobalt transport protein CbiQ	-3.28784	7.87149e-20	9033.68	2747.61
PPA1924	NADH dehydrogenase subunit L	-3.31326	7.42565e-14	14484	4371.51
PPA1923	NADH dehydrogenase subunit M	-3.31355	8.18483e-12	12803.8	3864.09
PPA1911	ABC transporter, ATP-binding	-3.31448	8.05886e-08	5886.73	1776.06
PPA0173	transport ATP-binding protein, CydCD	-3.32346	3.5776e-12	1675.61	504.175
PPA1239	F0F1 ATP synthase subunit beta	-3.33125	4.45763e-18	3904.85	1172.19
PPA1929	NADH dehydrogenase subunit H	-3.35657	4.74615e-15	9499.14	2830.01
PPA1287	non-ribosomal peptide synthetase	-3.39343	5.55556e-06	4501.32	1326.48
PPA1240	ATP synthase gamma chain	-3.40541	1.42698e-24	5687.95	1670.27
PPA1631	thioesterase family protein	-3.4309	1.36886e-12	6010.01	1751.73
PPA0430	cobalt transport protein CbiM	-3.50777	5.77343e-14	12552.1	3578.37
PPA1285	putative biotin carboxylase	-3.62339	6.05204e-26	9598.47	2649.03
PPA1018	hypothetical protein PPA1018	-3.64043	5.60519e-45	5686.77	1562.11
PPA0756	UDP-N-acetylmuramoyl-L-alanyl-D-glutamate synthetase	-3.64284	2.04631e-14	4281.72	1175.38
PPA0757	cell division protein FtsW	-3.69999	6.34658e-18	5682.22	1535.74
PPA2288	glucose-1-phosphate thymidylyltransferase	-3.70099	1.92777e-09	3700.72	999.926
PPA1151	hypothetical protein PPA1151	-3.70886	2.14747e-21	6972.19	1879.87
PPA0758	N-acetylglucosaminyl transferase	-3.73236	2.47922e-45	4320.83	1157.67
PPA0722	glucokinase	-3.73628	2.7768e-35	11665.4	3122.21
PPA1913	hypothetical protein PPA1913	-3.75167	1.28549e-20	6361.93	1695.76
PPA0509	nitrate reductase beta chain	-3.77157	0.035626	4343.58	1151.67
PPA0582	arginine/ornithine antiporter	-3.79533	4.0425e-25	14961.7	3942.14
PPA1962	putative cell wall-associated hydrolase	-4.01841	1.87065e-21	10691.1	2660.52
PPA1238	ATP synthase epsilon chain	-4.24907	0	6605.06	1554.47
PPA1231	CAMP factor 4	-4.25211	8.19749e-20	5485.93	1290.17
PPA0508	nitrate reductase delta subunit	-4.28035	7.19598e-25	4779.48	1116.61
PPA0539	alcohol dehydrogenase	-4.53251	1.09688e-16	3389.82	747.89
PPA1437	succinate dehydrogenase/fumarate reductase iron-sulfur subunit	-4.63569	2.29193e-39	2991.69	645.36
PPA1928	NADH dehydrogenase subunit I	-4.72513	1.03229e-12	15712.9	3325.39
PPA0511	nitrate/nitrite transporter	-4.81982	2.3234e-17	8937.44	1854.31
PPA0585	carbamate kinase	-4.87458	0	10071.7	2066.17
PPA1883	DNA-directed RNA polymerase subunit beta'	-4.90038	5.22803e-14	4678.25	954.67
PPA1991	oxidative stress transcriptional regulatory protein	-5.00827	1.59482e-16	11329	2262.06
PPA1662	lysozyme M1 precursor	-5.89416	5.36581e-26	22141	3756.43
PPA0844	ABC transporter ATP-binding protein fragment	-5.90895	0	3838.36	649.584
PPA2141	hypothetical protein PPA2141	-5.94195	1.46504e-19	15081.1	2538.07
PPA1439	succinate dehydrogenase cytochrome B-558 subunit	-6.63327	0	12206.4	1840.18
PPA1438	succinate dehydrogenase flavoprotein subunit	-7.50462	0	6387.32	851.119
