# Supplementary material for: Comparative Genomics and Transcriptomics of Propionibacterium acnes
Source: PLoS One. 2011 Jun 27;6(6):e21581. doi: 10.1371/journal.pone.0021581 (PMC3124536; doi:10.1371/journal.pone.0021581)
Supplement: Table S4 — Gene expression changes between exponential and stationary phase P. acnes KPA171202. P. acnes was grown in BHI medium to OD 0.3 (exp) and OD 0.8 (stat) under anaerobic conditions. The intensities were calculated as the average intensity of all oligomers that covered the respective gene. Only significantly de-regulated genes with fold changes >2 or <-2 are listed. For further details see the GEO entry GSE26738 or go to: http://bioinfo.mpiib-berlin.mpg.de/pacnes/. (XLS) [file pone.0021581.s005.xls]

## Sheet: Table S4
Table S4: Gene expression changes between exponential and stationary phase P. acnes KPA171202
P. acnes was grown in BHI medium to OD 0.3 (exp) and OD 0.8 (stat) under anaerobic conditions. The intensities were calculated as the
average intensity of all oligomers that covered the respective gene. Only significantly de-regulated genes with fold changes >2 or <-2 are listed.
For further details see the GEO entry GSE26738 or go to: http://bioinfo.mpiib-berlin.mpg.de/pacnes/
gene	start	stop	strand	annotation	fold-change	p-value	intensity exp	intensity stat
PPA0580	641010	641438	+	stress-induced protein	11.4572	0	574.872	6586.4
PPA2201	2381756	2383180	+	argininosuccinate synthase	9.31782	3.37151e-25	558.937	5208.07
PPA0737	808957	809415	+	18 kDa antigen 2	7.53604	0	1493.92	11258.2
PPA0664	728895	730301	+	glutamine synthetase	7.26645	0	3933.62	28583.4
PPA0390	435790	436344	+	hypothetical protein PPA0390	6.42913	0	2280.52	14661.7
PPA0391	436341	437057	+	hypothetical protein PPA0391	6.21556	0	4767.87	29635
PPA0387	434660	435178	+	hypothetical protein PPA0387	6.02364	0	1251.27	7537.17
PPA0389	435375	435788	+	hypothetical protein PPA0389	4.62613	0	2196.75	10162.4
PPA0096	111808	112098	-	hypothetical protein PPA0096	4.59764	9.00557e-09	279.006	1282.77
PPA0581	641558	642247	+	NonF-related protein	4.58918	0	595.895	2734.67
PPA1069	1164465	1165919	+	aromatic amino acid transport protein	4.2391	3.58118e-08	1408.2	5969.52
PPA1975	2139021	2141267	-	nitric-oxide reductase subunit B	4.2316	0	2002.02	8471.75
PPA1549	1667019	1668467	-	hypothetical protein PPA1549	4.03304	0	1982.83	7996.81
PPA0997	1079597	1080541	+	aspartate carbamoyltransferase catalytic subunit	3.68559	0	2641.45	9735.3
PPA1449	1566351	1566692	+	HicB family protein	3.66139	2.0315e-08	897.652	3286.66
PPA0097	112227	113678	+	catalase	3.56215	2.35897e-13	1390.02	4951.46
PPA0671	738690	740111	-	glutamine synthetase	3.50698	0	5968.77	20932.4
PPA0407	452588	453424	-	putative ABC transporter ATP-binding subunit	3.48487	0	2273.46	7922.71
PPA1039	1130324	1131598	+	putative aminooxidase	3.45967	9.02859e-06	813.671	2815.03
PPA0140	168440	169240	+	putative ketoacyl reductase	3.38521	0	4086.38	13833.3
PPA1098	1189749	1190360	-	molecular chaperone	3.36898	0	4172.74	14057.9
PPA1068	1163084	1164460	+	tryptophanase	3.35362	2.30569e-32	1658.97	5563.54
PPA0842	922490	922726	+	hypothetical protein PPA0842	3.25124	6.36834e-11	542.041	1762.31
PPA1117	1217168	1218268	+	tRNA (5-methylaminomethyl-2-thiouridylate)-methyltransferase	3.25118	0	1326.31	4312.08
PPA0449	495192	495638	+	hypothetical protein PPA0449	3.18075	4.34194e-33	3172.77	10091.8
PPA0406	451944	452591	-	ABC transporter-associated permease	3.15583	9.15e-26	1913.05	6037.25
PPA0405	451252	451947	-	ABC transporter-associated permease	3.1467	6.89036e-21	1665.07	5239.49
PPA1550	1668464	1669228	-	ArsR family transcriptional regulator	3.13227	8.14969e-17	3027.82	9483.94
PPA1099	1190396	1191412	-	hypothetical protein PPA1099	3.11654	0	22134.9	68984.3
PPA1561	1681304	1682413	-	membrane protein, putative heme O synthase	3.0781	0	6290.45	19362.6
PPA0557	616495	618114	+	sodium-and chloride-dependent transporter	3.04945	3.97841e-24	1560.23	4757.85
PPA0079	85493	86950	+	aldehyde dehydrogenase	3.01333	4.19453e-38	1202.69	3624.11
PPA2127	2302311	2303528	+	putative adhesion or S-layer protein	3.00904	0	8884.94	26735.1
PPA0448	494686	495183	+	hypothetical protein PPA0448	2.99906	0	2400.34	7198.76
PPA1974	2138227	2139024	-	hypothetical protein PPA1974	2.97459	0	1459.9	4342.62
PPA0392	437114	437689	+	putative RNA polymerase sigma factor	2.92091	0	2195.29	6412.23
PPA0139	167045	168424	+	reductase, ferredoxin	2.91617	2.49687e-34	3738.1	10900.9
PPA0404	450307	451230	-	putative substrate-binding protein	2.86368	7.48992e-21	868.758	2487.84
PPA1197	1304295	1305065	+	hypothetical protein PPA1197	2.83774	1.24302e-14	8322.38	23616.7
PPA0020	22780	23049	+	hypothetical protein PPA0020	2.83242	0	1345.03	3809.7
PPA2454	2127072	2127151	+	Phe tRNA	2.82798	0	2505.25	7084.82
PPA1736	1893412	1894818	-	hypothetical protein PPA1736	2.81864	0	2891.53	8150.18
PPA0804	883718	884707	+	TerC family membrane protein	2.7968	0	2080.28	5818.12
PPA0487	537474	537839	+	thiol-disulfide isomerase	2.79087	2.66937e-18	13500.8	37679.2
PPA0999	1081872	1082960	+	carbamoyl phosphate synthase small subunit	2.78039	3.51053e-31	2233.45	6209.86
PPA1063	1158598	1159836	-	ribonuclease D	2.72841	4.14181e-32	3503.36	9558.61
PPA0733	804584	806845	-	putative helicase protein	2.71064	3.21037e-42	935.13	2534.8
PPA2056	2233261	2234598	-	beta-glucanase	2.67789	0	424.371	1136.42
PPA2154	2338626	2339597	+	putative peptide ABC transporter, permease component	2.67587	1.02964e-18	1430.29	3827.27
PPA1489	1606027	1606458	-	ribosome-binding factor A	2.67583	3.64338e-44	1799.08	4814.04
PPA1141	1240383	1241297	+	N-acetylmuramic acid-6-phosphate etherase	2.67497	5.09129e-20	1964.5	5254.97
PPA1455	1571072	1572028	+	transport system permease	2.65439	2.52294e-11	1671.98	4438.1
PPA0411	455425	456441	+	zinc-binding dehydrogenase	2.62029	0	1695.47	4442.62
PPA0998	1080538	1081875	+	dihydroorotase	2.61916	0	1711.68	4483.16
PPA1735	1892174	1893415	-	hypothetical protein PPA1735	2.61066	0	1825.04	4764.55
PPA0723	795274	795681	-	hypothetical protein PPA0723	2.58836	5.59575e-16	1698.44	4396.17
PPA0459	504802	506700	+	thiamine pyrophosphate-requiring enzyme, putative acetolactate synthase	2.57494	6.10773e-20	943.744	2430.08
PPA0559	619028	620254	+	membrane spanning protein	2.55782	0	2230.3	5704.71
PPA1506	1628291	1629433	-	4-hydroxy-3-methylbut-2-en-1-yl diphosphate synthase	2.53181	0	3059.32	7745.62
PPA1981	2150707	2152113	+	pyridine nucleotide-disulphide oxidoreductase	2.52792	0	997.499	2521.59
PPA0728	799479	800435	-	membrane spanning protein DUF6	2.52046	0	10311.6	25989.9
PPA0412	456507	457520	+	putative ABC transporter ATP-binding protein	2.50728	1.39562e-27	1255.75	3148.52
PPA1245	1351398	1352174	-	ATP synthase A chain	2.50251	4.88703e-41	10280	25725.7
PPA2152	2335970	2337637	+	putative peptide transport system secreted peptide-binding protein	2.48818	1.84436e-24	1439.14	3580.84
PPA1454	1569457	1570992	+	solute-binding protein of transport system	2.48694	1.70566e-19	1925.65	4788.99
PPA1676	1829333	1829662	+	ferrous iron transport protein A	2.48229	0.00014	2804.89	6962.55
PPA0380	425934	428375	-	hyalorunate lyase	2.482	1.59863e-20	863.481	2143.16
PPA2088	2262771	2263454	+	hypothetical protein PPA2088	2.44362	5.08499e-14	3019.07	7377.46
PPA0751	824676	825140	+	hypothetical protein PPA0751	2.43574	0	2176.03	5300.26
PPA2153	2337710	2338633	+	putative peptide ABC transporter, permease component	2.42255	0	716.587	1735.97
PPA0278	326692	329226	+	Clp family ATP-binding protease	2.37265	0	6912.16	16400.2
PPA0460	506845	507159	-	hypothetical protein PPA0460	2.36531	0	3483.43	8239.4
PPA1205	1313543	1314163	-	TetR family transcriptional regulator	2.34885	0	1443.39	3390.3
PPA0446	491219	492808	-	ascorbate-specific PTS system enzyme IIC	2.34432	9.23397e-12	713.63	1672.98
PPA0727	798816	799463	+	putative Zn-dependent hydrolase	2.33861	0	2137.49	4998.74
PPA1018	1102944	1103144	-	hypothetical protein PPA1018	2.33536	0	7679.84	17935.2
PPA1000	1082960	1086166	+	carbamoyl phosphate synthase large subunit	2.30873	1.65614e-25	1279.46	2953.92
PPA0663	728027	728896	-	hypothetical protein PPA0663	2.29459	0	3037.03	6968.74
PPA0478	528593	529393	+	hypothetical protein PPA0478	2.28725	0	6429.59	14706.1
PPA1010	1093621	1094424	-	putative transcriptional regulatory protein	2.28342	4.30129e-30	4640.18	10595.5
PPA2305	2504189	2504941	-	glycerol uptake facilitator protein	2.28072	1.20952e-26	973.978	2221.37
PPA1272	1379370	1380623	-	D-3-phosphoglycerate dehydrogenase	2.27876	0	1475.3	3361.87
PPA1032	1122642	1124162	+	RNA polymerase sigma factor	2.27603	0	3639.73	8284.12
PPA1505	1627444	1628289	-	acetyltransferase family protein	2.2552	0	1821.7	4108.29
PPA1097	1189544	1189699	-	hypothetical protein PPA1097	2.25302	7.65e-40	6800.97	15322.7
PPA1980	2149968	2150405	-	hypothetical protein PPA1980	2.25133	6.77608e-17	6396.81	14401.3
PPA0488	538011	539627	+	sugar transporter family protein	2.25062	0	10177.1	22904.8
PPA2135	2311852	2314530	+	DeaD/DeaH box helicase	2.23929	0	2553.71	5718.48
PPA1246	1352171	1352425	-	hypothetical protein PPA1246	2.22125	1.97527e-33	8505.87	18893.6
PPA0394	438197	438550	+	hypothetical protein PPA0394	2.218	5.565e-27	2556.32	5669.92
PPA0700	771105	771458	+	HesB protein, putative for nitrogen fixation	2.21614	0	6124.83	13573.5
PPA1677	1829723	1831687	+	ferrous iron transport protein B	2.21612	5.48106e-14	1380.47	3059.3
PPA1879	2037511	2038041	-	hypothetical protein PPA1879	2.19971	1.0622e-30	5430.84	11946.2
PPA1819	1984010	1984534	+	beta-galactosidase	2.18877	0	2072.68	4536.62
PPA2382	1373028	1373294	-	putative anti-sigma factor	2.18623	1.38641e-16	52965	115794
PPA0831	911231	911839	+	TetR family transcriptional regulator	2.14985	1.87923e-38	2344.93	5041.24
PPA0561	621380	621886	-	transcription elongation factor GreA	2.14657	0	4638.29	9956.43
PPA1348	1471924	1472856	-	acetylglutamate kinase	2.13888	4.34305e-10	985.578	2108.04
PPA0827	909691	909999	+	50S ribosomal protein L21	2.13781	4.9154e-30	7275.23	15553.1
PPA2354	935053	935337	+	putative transposase	2.13631	0	2667.68	5699
PPA0703	774262	774657	+	hypothetical protein PPA0703	2.13531	0	3494.13	7461.07
PPA0995	1079025	1079600	+	pyrimidine regulatory protein PyrR	2.11747	1.44477e-27	1741.45	3687.46
PPA2359	2248722	2249660	+	putative transcriptional repressor protein	2.11539	1.53894e-23	289.205	611.781
PPA1349	1472853	1473662	-	bifunctional ornithine acetyltransferase/N-acetylglutamate synthase protein	2.09943	0.00099	770.258	1617.1
PPA0469	518116	519183	+	putative myo-inositol 2-dehydrogenase	2.08454	2e-05	859.892	1792.48
PPA1038	1129953	1130246	+	hypothetical protein PPA1038	2.08056	4.17614e-06	921.855	1917.97
PPA1115	1213662	1215782	-	putative glycogen debranching enzyme	2.08031	1.04515e-11	2064.17	4294.11
PPA0227	280063	281325	-	putative sodium:proton antiporter	2.07444	2.10195e-44	1082.36	2245.3
PPA1172	1273635	1278068	-	fused activator of 2-hydroxyglutaryl-CoA dehydratase/hypothetical protein	2.06444	4.49644e-10	1125.2	2322.9
PPA0841	922028	922375	+	hypothetical protein PPA0841	2.06074	0	4403.74	9074.95
PPA1347	1470717	1471913	-	acetylornithine aminotransferase	2.05907	3.684e-09	627.816	1292.72
PPA0388	435190	435375	+	hypothetical protein PPA0388	2.05889	0.00435	7640.54	15731
PPA1118	1218265	1219251	+	putative B12 independent methionine synthase	2.04964	0	2253.04	4617.92
PPA0474	524223	526352	-	DeaD/DeaH box family protein	2.04373	0	2259.67	4618.15
PPA0945	1026322	1027485	-	putative histidine kinase	2.03786	3.78351e-44	7845.22	15987.4
PPA0472	520885	521889	-	hypothetical protein PPA0472	2.03184	0	3510.98	7133.74
PPA1096	1187793	1189547	-	membrane spanning protein	2.02449	0	1964.1	3976.3
PPA0572	632907	633878	+	4-hydroxy-3-methylbut-2-enyl diphosphate reductase	2.00844	3.40659e-24	3727.57	7486.6
PPA1364	1486763	1487482	+	putative transcriptional regulator	2.00632	0	1577.69	3165.36
PPA1144	1243274	1244209	+	putative N-acetylglucosamine kinase	2.00537	1.26181e-11	1576.04	3160.54
PPA1093	1185480	1186181	+	5`-methylthioadenosine/S-adenosylhomocysteine nuclosidase	2.00444	1.12345e-35	3293.91	6602.43
PPA1061	1153711	1156377	+	aconitate hydratase	2.00208	0	1658.2	3319.85
PPA1165	1265272	1266366	+	ion channel membrane protein	-1.99734	6.21808e-10	2509.07	1256.2
PPA1675	1828307	1829200	-	glutamate racemase	-1.99779	1.34492e-20	2690.13	1346.56
PPA0065	66444	67739	+	hypothetical protein PPA0065	-2.02984	6.84199e-06	1023.96	504.453
PPA1543	1662579	1662935	-	hypothetical protein PPA1543	-2.03344	2.38918e-14	19223.6	9453.76
PPA2313	2513545	2513982	-	OsmC-like protein	-2.04789	7.73447e-15	3512.02	1714.94
PPA0148	177696	178769	+	putative UDP-N-acetylglucosamine 2-epimerase	-2.06778	8.07054e-27	2650.49	1281.8
PPA1275	1382201	1383013	-	permease protein of oligopeptide ABC transporter	-2.07318	0	2520	1215.52
PPA2041	2215797	2216030	-	hypothetical protein PPA2041	-2.07904	0	2416.57	1162.35
PPA1861	2015546	2015854	-	50S ribosomal protein L23	-2.07931	2.48568e-25	6510.46	3131.07
PPA0509	557396	558919	-	nitrate reductase beta chain	-2.10508	0	4026.9	1912.95
PPA1637	1782097	1782558	-	single-strand binding protein	-2.11057	2.38025e-14	1556.35	737.405
PPA0963	1047389	1048324	+	cysteine synthase	-2.1149	9.80909e-45	1400.84	662.37
PPA0409	454390	454761	+	hypothetical protein PPA0409	-2.12438	1.81699e-26	3144.35	1480.12
PPA0822	903062	903448	+	hypothetical protein PPA0822	-2.17769	7.2939e-39	6458.36	2965.7
PPA1850	2010204	2010836	-	50S ribosomal protein L5	-2.17832	0	5424.11	2490.04
PPA0731	802464	802862	+	hypothetical protein PPA0731	-2.18326	3.78158e-11	4566.21	2091.47
PPA0173	207350	208954	-	transport ATP-binding protein, CydCD	-2.2132	1.87083e-30	1743.49	787.769
PPA0170	204847	205509	+	putative ABC transporter	-2.21399	1.20013e-07	1142.99	516.259
PPA2011	2184062	2185087	-	fructose-bisphosphate aldolase	-2.22368	0	6975.5	3136.92
PPA0533	587227	587796	+	hypothetical protein PPA0533	-2.23223	2.34177e-09	2104.72	942.877
PPA0977	1061857	1062813	+	aerotolerance protein BatA	-2.23439	2.66247e-44	4952.62	2216.54
PPA1817	1981437	1982270	-	ABC transporter ATP-binding protein	-2.24891	0	2497.38	1110.48
PPA0823	903470	903898	+	nucleoside diphosphate kinase	-2.25435	3.78619e-33	8312.37	3687.26
PPA1631	1773060	1773905	-	thioesterase family protein	-2.25468	3.26492e-10	7528.57	3339.09
PPA2452	2126451	2126529	+	Glu tRNA	-2.25545	0.03212	940.136	416.829
PPA2012	2185198	2185788	-	hypothetical protein PPA2012	-2.25974	4.82171e-28	2986.99	1321.83
PPA2418	608072	610963	+	23SrRNA	-2.26142	1e-05	143398	63410.7
PPA1826	1994948	1995964	-	DNA-directed RNA polymerase subunit alpha	-2.2651	1.1677e-13	2478.49	1094.21
PPA1883	2041158	2045039	-	DNA-directed RNA polymerase subunit beta'	-2.26659	7.12255e-30	5811.97	2564.2
PPA1730	1886085	1886525	-	cytidine deaminase	-2.27127	4.912e-23	3445.02	1516.78
PPA1833	1998703	1999542	-	methionine aminopeptidase	-2.28493	2.05376e-22	4817.61	2108.43
PPA1849	2010011	2010196	-	30S ribosomal protein S14	-2.28623	0	8499.23	3717.58
PPA0129	154728	156065	+	hypothetical protein PPA0129	-2.28815	0	2828.1	1235.98
PPA0011	14515	15147	+	hypothetical protein PPA0011	-2.28995	0	2702.63	1180.21
PPA1834	1999544	2000113	-	adenylate kinase	-2.29353	7.32837e-07	7375.47	3215.77
PPA0821	901620	903065	+	folylpolyglutamate synthase	-2.29567	8.66145e-11	2164.6	942.904
PPA0146	175105	176364	+	hypothetical protein PPA0146	-2.30202	0	4856.14	2109.51
PPA2326	2527000	2527806	-	DeoR family transcriptional regulator	-2.30493	4.36533e-14	797.404	345.955
PPA1889	2050434	2051132	-	50S ribosomal protein L1	-2.30592	3.4267e-11	4756.3	2062.65
PPA1993	2165117	2166436	-	phosphoribosylamine-glycine ligase	-2.36186	2.71228e-22	1938.53	820.763
PPA1499	1618624	1620381	-	prolyl-tRNA synthetase	-2.3648	1.14927e-07	2450.79	1036.36
PPA1816	1979842	1981455	-	ABC transporter associated permease	-2.39201	0	6294.3	2631.39
PPA1860	2014683	2015519	-	50S ribosomal protein L2	-2.40236	2.97238e-15	6853.02	2852.62
PPA0575	636616	637689	+	translation-associated GTPase	-2.41958	6.14819e-17	4625.61	1911.74
PPA0861	939741	940823	+	hypothetical protein PPA0861	-2.43828	2.12785e-15	7495.75	3074.2
PPA0432	476913	477347	+	cobalt transport protein CbiN	-2.45093	4.5022e-21	11457.1	4674.61
PPA2204	2387400	2387957	+	hypothetical protein PPA2204	-2.45147	7.75919e-08	1588.13	647.83
PPA0184	223855	225753	-	putative serine/threonine protein kinase	-2.45647	5.66125e-08	1265.16	515.032
PPA1055	1147324	1148058	+	hypothetical protein PPA1055	-2.48992	4.97927e-12	10315.8	4143.02
PPA0476	527278	528063	+	glucosamine-6-phosphate deaminase	-2.4949	1.92339e-09	2323.5	931.3
PPA1935	2096758	2097315	-	NADH dehydrogenase subunit B	-2.49999	4.92135e-34	9483.24	3793.31
PPA1848	2009444	2009851	-	30S ribosomal protein S8	-2.50955	6.40334e-14	5437.57	2166.75
PPA0143	171619	172569	-	putative phosphofructokinase	-2.51135	1.54494e-06	956.513	380.876
PPA0758	833972	835090	+	N-acetylglucosaminyl transferase	-2.51934	1.41527e-23	8199.91	3254.79
PPA0144	172897	173658	-	DeoR family transcriptional regulator	-2.53517	7.72207e-09	1482.44	584.75
PPA1843	2007634	2007816	-	50S ribosomal protein L30	-2.56659	0.00062	1658.05	646.015
PPA0644	708223	709797	-	endoglycoceramidase	-2.58925	5.02013e-25	11549.7	4460.63
PPA1766	1928299	1928646	-	chorismate mutase	-2.60247	2e-05	4807.53	1847.3
PPA1163	1263564	1264739	+	preprotein translocase subunit SecF	-2.61564	1.14815e-22	7243.98	2769.49
PPA0508	556723	557394	-	nitrate reductase delta subunit	-2.62724	4.69672e-12	3892.95	1481.76
PPA2142	2321679	2322800	+	putative lysophospholipase	-2.62918	5.94958e-38	6301.82	2396.88
PPA1528	1649799	1650767	-	hypothetical protein PPA1528	-2.65972	1.61419e-08	5794.35	2178.56
PPA1389	1508736	1509395	-	putative ADP-ribose pyrophosphatase	-2.6694	1.14213e-11	2473.48	926.606
PPA0722	794199	795269	+	glucokinase	-2.67342	2.31577e-27	11696.3	4375.03
PPA1520	1642256	1643068	-	elongation factor Ts	-2.67798	0	13354.5	4986.76
PPA1164	1264736	1265269	+	adenine phosphoribosyltransferase	-2.67925	3.38655e-11	3537.39	1320.29
PPA1433	1551333	1551947	-	ribonuclease HII	-2.71103	9.82342e-16	6272.36	2313.64
PPA1498	1616712	1618466	-	hypothetical protein PPA1498	-2.75973	1.36746e-09	2979.08	1079.48
PPA1682	1834697	1834972	+	DNA-binding protein HU	-2.76322	1.98664e-10	10856.9	3929.08
PPA1856	2012675	2013094	-	50S ribosomal protein L16	-2.79587	4.26543e-08	13758.5	4921.02
PPA1472	1592274	1592537	-	30S ribosomal protein S15	-2.82034	1.54015e-38	9148.71	3243.84
PPA2324	2525731	2526213	-	ribose 5-phosphate isomerase	-2.82095	9.7004e-12	2741.48	971.826
PPA0507	556013	556726	-	nitrate reductase gamma subunit	-2.83426	1.52916e-07	5340.45	1884.25
PPA2227	2411883	2412332	-	50S ribosomal protein L9	-2.85307	1.85317e-16	3198.62	1121.12
PPA1437	1553582	1554355	-	succinate dehydrogenase/fumarate reductase iron-sulfur subunit	-2.86675	3.13883e-17	4969.81	1733.6
PPA1239	1345628	1347082	-	F0F1 ATP synthase subunit beta	-2.87286	4.93987e-29	4121.03	1434.47
PPA0496	546284	547087	+	hypothetical protein PPA0496	-2.88101	4.79187e-17	7410.76	2572.28
PPA1910	2072718	2073941	-	ABC transporter permease	-2.89442	5.76814e-20	3643.31	1258.74
PPA0539	590844	591899	-	alcohol dehydrogenase	-2.92108	0	4134.66	1415.46
PPA1025	1110246	1110755	+	transcriptional regulator NrdR	-2.93952	0	10859.1	3694.17
PPA0687	756689	757492	-	CAMP2 factor	-2.96908	2.20324e-27	5558.75	1872.22
PPA1438	1554352	1556379	-	succinate dehydrogenase flavoprotein subunit	-3.00431	3.49762e-32	6194	2061.71
PPA1333	1452303	1455008	-	preprotein translocase subunit SecA	-3.01556	2.24663e-38	6636.55	2200.77
PPA2349	2557347	2557958	-	jag-like protein	-3.02025	1e-05	731.954	242.349
PPA1842	2007192	2007632	-	50S ribosomal protein L15	-3.03938	4.97381e-25	2950.21	970.661
PPA2229	2412712	2413266	-	single-strand DNA-binding protein	-3.04226	7e-05	20472.1	6729.25
PPA0862	940823	942142	+	hypothetical protein PPA0862	-3.05783	9.11796e-14	12558.9	4107.13
PPA1845	2008488	2008871	-	50S ribosomal protein L18	-3.09187	4.83299e-26	5443.13	1760.46
PPA1825	1994109	1994645	-	50S ribosomal protein L17	-3.10028	2.23409e-11	1504.37	485.235
PPA1844	2007816	2008463	-	30S ribosomal protein S5	-3.16398	4.66067e-19	6300.25	1991.24
PPA2175	2357193	2358224	+	rare lipoprotein A (RlpA) family protein	-3.24084	1.68886e-23	1597.88	493.046
PPA1807	1972331	1972624	-	hypothetical protein PPA1807	-3.25343	0.0002	8083.85	2484.72
PPA0863	942173	942763	+	hypothetical protein PPA0863	-3.26419	2.84883e-14	8642.48	2647.66
PPA1932	2093854	2094639	-	NADH dehydrogenase subunit E	-3.28993	0	16822.2	5113.23
PPA1434	1551983	1552807	-	signal peptidase I	-3.30296	8.97933e-15	18322.2	5547.2
PPA1926	2087319	2088173	-	NADH dehydrogenase subunit J	-3.33331	1.06472e-21	9719.43	2915.85
PPA1936	2097409	2097768	-	NADH dehydrogenase subunit A	-3.3765	5.46429e-11	28968.6	8579.48
PPA1435	1552978	1553331	-	50S ribosomal protein L19	-3.38614	0	3545.69	1047.12
PPA1694	1847395	1847652	-	transcription factor WhiB	-3.39356	5.62004e-07	10725.3	3160.5
PPA0534	587816	588412	+	hypothetical protein PPA0534	-3.51713	1.54274e-16	7422.07	2110.26
PPA1931	2092523	2093857	-	NADH dehydrogenase I chain F	-3.52923	3.25233e-22	9603.08	2721.01
PPA2228	2412346	2412585	-	30S ribosomal protein S18	-3.57944	9.54782e-35	30795.5	8603.44
PPA1439	1556379	1557113	-	succinate dehydrogenase cytochrome B-558 subunit	-3.6559	0	24757.3	6771.88
PPA1859	2014386	2014667	-	30S ribosomal protein S19	-3.76338	5.07961e-10	2812.08	747.221
PPA1929	2088769	2090091	-	NADH dehydrogenase subunit H	-3.87888	0	8369.65	2157.75
PPA0864	942787	944355	+	hypothetical protein PPA0864	-3.93462	0	25685.6	6528.11
PPA1853	2012167	2012439	-	30S ribosomal protein S17	-3.99016	6.15098e-20	3451.26	864.942
PPA1858	2013907	2014368	-	50S ribosomal protein L22	-4.15191	0	6841.78	1647.86
PPA0721	793035	794192	+	NPL/P60 family secreted protein	-4.25293	0	32823.4	7717.83
PPA1925	2087023	2087322	-	NADH dehydrogenase subunit K	-4.26203	0	10492.2	2461.79
PPA1922	2082002	2083618	-	NADH dehydrogenase subunit N	-4.36499	0	12421.6	2845.73
PPA0545	599061	600341	+	phosphopyruvate hydratase	-4.50321	0	24016.2	5333.14
PPA0532	585914	587191	+	hypothetical protein PPA0532	-4.57836	1.21871e-26	11833.6	2584.69
PPA1930	2090088	2092526	-	NADH dehydrogenase subunit G	-4.59446	1.61015e-35	6513.17	1417.61
PPA0583	644650	645894	+	arginine deiminase	-4.73781	0	5646.07	1191.7
PPA1238	1345182	1345622	-	ATP synthase epsilon chain	-4.74516	0	11050.8	2328.86
PPA1855	2012442	2012675	-	50S ribosomal protein L29	-4.78156	0	8564.99	1791.25
PPA1923	2083615	2085108	-	NADH dehydrogenase subunit M	-4.85627	0	11274.7	2321.67
PPA0865	944352	945068	+	hypothetical protein PPA0865	-4.85891	6.56924e-31	11384.4	2343
PPA0584	645968	646972	+	ornithine carbamoyltransferase, catabolic	-4.93698	0	4796.83	971.614
PPA1857	2013096	2013905	-	30S ribosomal protein S3	-4.95102	8.26354e-11	4787.78	967.029
PPA0866	945258	945503	+	hypothetical protein PPA0866	-5.12975	3.58935e-09	4556.89	888.324
PPA1913	2074564	2075493	-	hypothetical protein PPA1913	-5.20407	0	5750.75	1105.05
PPA1928	2088173	2088769	-	NADH dehydrogenase subunit I	-5.24146	8.82818e-44	10669.9	2035.67
PPA1924	2085126	2087012	-	NADH dehydrogenase subunit L	-5.38263	0	25487.5	4735.13
PPA1911	2073938	2074507	-	ABC transporter, ATP-binding	-5.38845	8.53113e-35	6886.66	1278.04
PPA1885	2048986	2049378	-	50S ribosomal protein L7/L12	-5.99569	1.8461e-13	4124.93	687.983
PPA1887	2049392	2050006	-	50S ribosomal protein L10	-6.02155	4.20913e-13	6705.83	1113.64
PPA1773	1937641	1937937	-	10 kDa chaperonin	-6.03353	0	8640.84	1432.14
PPA0453	498152	499786	+	chaperonin GroEL	-6.16883	0	4921.85	797.859
PPA0582	643038	644519	+	arginine/ornithine antiporter	-6.19209	0	9956.5	1607.94
PPA1340	1462006	1462863	-	CAMP1 factor	-6.34939	0	22182.1	3493.57
PPA2239	2422254	2423447	-	hypothetical protein PPA2239	-6.50946	4.4788e-15	12895.1	1980.98
PPA1771	1935137	1935826	-	hypothetical protein PPA1771	-6.75253	1.40679e-16	12927.6	1914.48
PPA0585	646993	647898	+	carbamate kinase	-6.81473	0	8749.26	1283.87
PPA2141	2320819	2321400	+	hypothetical protein PPA2141	-8.41261	2.80375e-15	71569.6	8507.43
PPA1772	1936034	1937629	-	chaperonin GroEL	-11.6546	7.52778e-42	31030.7	2662.51
